# Supplementary material for: PYCR1 Levels Track with Premature and Chronological Skin Aging
Source: bioRxiv or medRxiv preprint supplement (doi:10.1101/2023.05.24.23289766), 2023-05-28
Supplement: Supplementary file [file media-1.pdf]

**Supplementary Table 1:** List of primers sequences

| <b>Sanger sequencing</b>         |                                                                                                  |
|----------------------------------|--------------------------------------------------------------------------------------------------|
| <i>PYCR1</i> exon 1 fw           | 5'-CCCTAATCCGCTCTCGAT-3'                                                                         |
| <i>PYCR1</i> exon 1 rev          | 5'-CCTGCAGAAGTGGAAGAGG-3'                                                                        |
| <i>PYCR1</i> exon 5 fw           | 5'-TCTGCACGGAGGTGGAAG-3'                                                                         |
| <i>PYCR1</i> exon 6 rev          | 5'-CCCCTAGTCCCCCTAGTGAC-3'                                                                       |
| <i>PYCR1</i> exon 6 fw           | 5'-CCTGGGGCTTCACTGGGA-3'                                                                         |
| <i>PYCR1</i> exon 6 rev          | 5'-CCCACAGTAACCCAGGGAAC-3'                                                                       |
| <i>PYCR1</i> exon 6 fw           | 5'-GGTGAAGAGGACCTGATTG-3'                                                                        |
| <i>PYCR1</i> exon 6 rev          | 5'-ATCTGCTGAGTGCCTGAATG-3'                                                                       |
| <i>PYCR1</i> exon 3 fw           | 5'-CAGCATTCTCTGTGCCATTC-3'                                                                       |
| <i>PYCR1</i> exon 3 rev          | 5'-TTCTCCTCCTTCCCTTCTGG-3'                                                                       |
| <b>Genotyping</b>                |                                                                                                  |
| <i>Pycr1</i> fw                  | 5'-TTTTGCTGCACACCTGACTC-3'                                                                       |
| <i>Pycr1</i> rev1                | 5'-AGCCAGGAAGAGCACATCAC-3'                                                                       |
| <i>Pycr1</i> rev2                | 5'-GCCTTGGCTCTGCTTTACAC-3'                                                                       |
| <b>Quantitative PCR</b>          |                                                                                                  |
| <i>PYCR1</i> fw                  | 5'-TGCTCATCAACGCTGTGG-3'                                                                         |
| <i>PYCR1</i> rev                 | 5'-CACCTGCTCCTGGTCAGC-3'                                                                         |
| <i>Pycr1</i> fw                  | 5'-TGTGAAAGTTGTGGGTCGTG-3'                                                                       |
| <i>Pycr1</i> rev                 | 5'-ACCGTAGCTTGGTCCATGTC-3'                                                                       |
| <i>PYCR2</i> fw                  | 5'-TCGGCTCACAAGATAATAGCC-3'                                                                      |
| <i>PYCR2</i> rev                 | 5'-TTCACCGTCTCCTTGTTC-3'                                                                         |
| <i>PYCR3</i> fw                  | 5'-CCCAGACCCTGCTGGGGACG-3'                                                                       |
| <i>PYCR3</i> rev                 | 5'-CTCCACGGCGCTCATGGTGG-3'                                                                       |
| <i>ALDH18A1</i> fw               | 5'-TCTCGTCCTGACTGTCTACCC-3'                                                                      |
| <i>ALDH18A1</i> rev              | 5'-TAACAAGCCATTGCCACTTG-3'                                                                       |
| <i>PRODH</i> fw                  | 5'-CCCTGCTTCGGCACTAGAG-3'                                                                        |
| <i>PRODH</i> rev                 | 5'-GGGCCCTGGTATTGCTTGTCC-3'                                                                      |
| <i>GAPDH</i> fw                  | 5'-TGAACCACCAACTGCTTAGC-3'                                                                       |
| <i>GAPDH</i> rev                 | 5'-GGCATGGACTGTGGTCATGAG-3'                                                                      |
| <i>PYCR1</i> fw                  | 5'-AACCGGTCGCCACCATGAGCTGGGGC-3'                                                                 |
| <i>PYCR1</i> rev                 | 5'-ACGCGTCCTAGGCTAATCCTTGCCCGC-3'                                                                |
| <b>Cloning</b>                   |                                                                                                  |
| <i>BRAF</i> <sup>V600E</sup> fw  | 5'-<br>TGCGCAAACCGGTGGCCACCATGGGTAAGCCTATCCCTAACCCCTCTCC<br>TCGGTCTCGATTCTACGGCGGCGCTGAGCGGTG-3' |
| <i>BRAF</i> <sup>V600E</sup> rev | 5'-TGCGCAAACGCGTCGTAGGTCAGTGGACAGGAAACGCACC-3'                                                   |
| <i>TP53</i> fw                   | 5'-TGCGCAAACCGGTGGCCACCATGGAGGAGCCGCAGTC-3'                                                      |
| <i>TP53</i> rev                  | 5'-TGCGCAAACGCGTCCTAGGTCAGTCTGAGTCAGGCCCTTC-3''                                                  |
| <i>P16</i> fw                    | 5'-TGCGCAAACCGGTGGCCACCATGGAGCCTTCGGCTGACTGG-3'                                                  |
| <i>P16</i> rev                   | 5'-TGCGCAAACGCGTCCTAGGTCATCGGGGATGTCTGAG-3'                                                      |
