# Supplementary material for: PYCR1 Levels Track with Premature and Chronological Skin Aging
Source: bioRxiv or medRxiv preprint supplement (doi:10.1101/2023.05.24.23289766), 2023-05-28
Supplement: Supplementary file [file media-2.pdf]

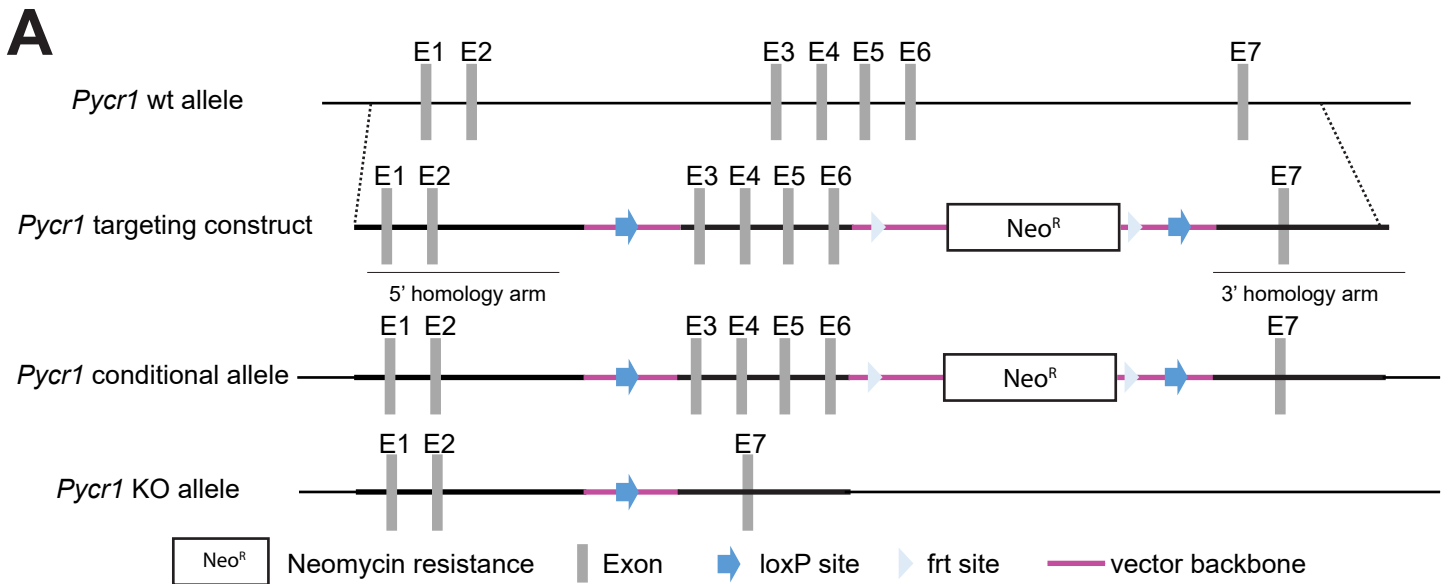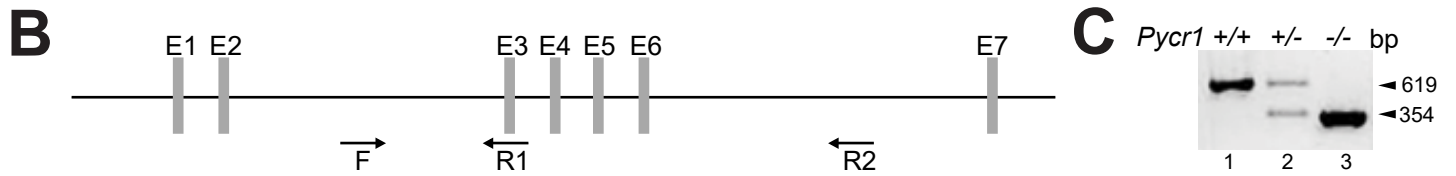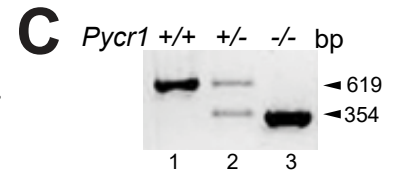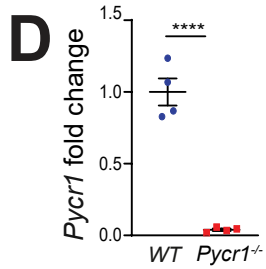

**E**

| Crosses                                                   | +/+ | +/- | -/- | L  | p-value    | %P   |
|-----------------------------------------------------------|-----|-----|-----|----|------------|------|
| <i>Pycr1</i> <sup>+/-</sup> x <i>Pycr1</i> <sup>+/-</sup> | 21  | 50  | 35  | 12 | 0.092 n.s. | 34   |
| <i>Pycr1</i> <sup>+/-</sup> x <i>Pycr1</i> <sup>-/-</sup> | 0   | 43  | 53  | 12 | 0.146 n.s. | 54.5 |

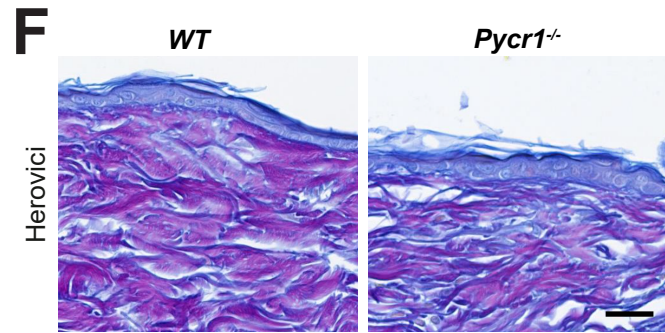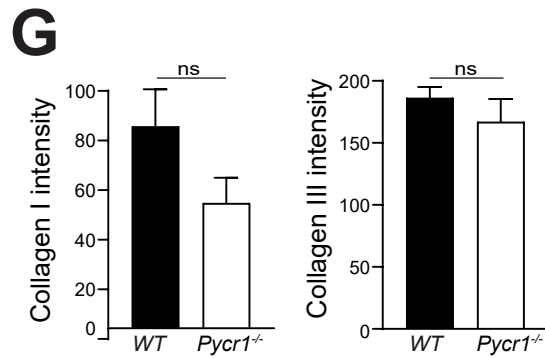

Suppl Figure 1

**Supplementary Figure S1: Generation of *Pycr1* knockout mice.** (A) Strategy and allele description for *Pycr1* knockout mice. (B) Schematic of gDNA from WT *Pycr1*. Arrows are depicting the primers used to genotype *Pycr1*<sup>+/+</sup> (619 bp, F + R1) and *Pycr1*<sup>-/-</sup> (354 bp, F + R2). (C) Genotyping of *Pycr1*<sup>+/+</sup>, *Pycr1*<sup>+/-</sup> and *Pycr1*<sup>-/-</sup> animals by PCR. (D) Quantitative real time PCR demonstrating that *Pycr1*<sup>-/-</sup> dermal fibroblasts have virtually no *Pycr1* transcripts left compared to WT. Two-tailed Student's t test, \*\*\*\*p<0.0001 (n = 4). (E) Distribution of genotypes from heterozygous intercrosses and *Pycr1*<sup>+/-</sup> x *Pycr1*<sup>-/-</sup> crosses illustrate that *Pycr1*<sup>-/-</sup> mice are born at expected Mendelian ratios. Two-tailed Student's t test, ns p>0.05. (F) Herovici staining shows that *Pycr1*<sup>-/-</sup> have less collagen I fibers (pink), whereas collagen III fibers (blue) appear unchanged. Scale bar, 100 μm. (G) Quantification shows no significant difference in collagen I and collagen III fibers between WT and *Pycr1*<sup>-/-</sup> mice. Intensity was calculated by averaging measurements from three mice/genotypes. Error bars indicate mean ± SEM. Two-tailed Student's t test, ns p>0.05, \*\*p<0.01, \*\*\*p<0.001.
